# Supplementary material for: QTL Mapping in New Arabidopsis thaliana Advanced Intercross-Recombinant Inbred Lines
Source: PLoS One. 2009 Feb 2;4(2):e4318. doi: 10.1371/journal.pone.0004318 (PMC2629843; doi:10.1371/journal.pone.0004318)
Supplement: Table S1 — Comparisons of publicly available RIL populations with the the EstC and KendC AI-RIL populations. (0.03 MB XLS) [file pone.0004318.s001.xls]

## Sheet: Sheet1
S.No	Population	No. of lines	No. of markers	Map distances (Chr1	Chr2	Chr3	Chr4	Chr5	Total Map Distance (cM)
1	Ler x Sha	114	66	92	62	74	73	78	379
2	Wt-5 x Ct-1	94	57						470
3	Sorbo x Gy-0	94	48						297
4	Kondara x Br-0	94	52						351
5	Cvi-0 x Ag-0	94	47						453
6	Ts-5 x 240#14	94	53						386
7	Nok-3 x Ga-0	94	58						448
8	Ler x Kas-2	120	78	99	79	78	65	90	411
9	Ler x Kondara	157	75	94	60	61	55	85	355
10	Ler x An-1	120	65	89	54	85	67	77	372
11	Ler x Cvi	162	321 (AFLP)	126	71	80	85	113	475
12	Ler x Col	300	67	117	68	70	77	95	427
13	Col x Nd-1	98	79	81	70	111	41	77	380
14	Bay-0 x Sha	411	38/69	90	70	75	80	85	400
15	Sf-2 x St-0	262	?						0
16	Nok-0 x Uk-3	220	?						0
17	Can-0 x Sav-0	304	?						0
18	Hi-0 x Ob-0	308	?						0
20	Col-0 x Kas-1	128	26	190	180	250	110	200	930
21	Ler x No	137	46	99	71	85	68	98	421
22	Col x C24	209	110	101	72	85	74	92	424
23	C24 x Col	214	110	101	72	85	74	92	424
24	Blh x Col	319	75	104	67	70	68	101	410
25	Bur x Col	347	87	99	56	66	53	90	364
26	Ct x Col	377	85	113	71	74	74	98	430
27	Cvi x Col	367	90	138	87	90	81	113	509
28	Sha x Col	349	86	96	61	68	68	87	380
29.0256	Est x Col	279	224	420	320	320	310	350	1720
30.0751	Kend x Col	282	181	380	250	370	160	390	1550

## Sheet: Sheet2
Population	Lines	Markers	Total Map Distance (cM)	Reference
Ler x Sha	114	66	378	Clerkx et al, Plant Physiol, 04
Wt-5 x Ct-1	94	57	470	O'Neill et al, TAG, 08
Sorbo x Gy-0	94	48	297	O'Neill et al, TAG, 08
Kondara x Br-0	94	52	351	O'Neill et al, TAG, 08
Cvi-0 x Ag-0	94	47	453	O'Neill et al, TAG, 08
Ts-5 x 240#14	94	53	386	O'Neill et al, TAG, 08
Nok-3 x Ga-0	94	58	448	O'Neill et al, TAG, 08
Ler x Kas-2	120	78	441	El-lithy et al, Genetics 06
Ler x Kondara	157	75	351	El-lithy et al, Genetics 06
Ler x An-1	120	65	371	El-lithy et al, Genetics 06
Ler x Cvi	162	322 (AFLPs)	475	Alonso-Blanco et al, Plant J, 98
Ler x Col	300	517 (AFLPs)	427	Alonso-Blanco et al, Plant J, 98
Col x Nd-1	98	79	408	Werner et al, PNAS 04
Bay-0 x Sha	411	38	358	Loudet et al, TAG, 01
Col-0 x Kas-1	128	26	378	Wilson et al, Genetics 01
Ler x No	137	46	421	Magliano et al, Plant Phys 05
Col x C24	409	110	425	Torjek et al, TAG, 06
Blh x Col	319	75	411	Simon et al, Genetics 08
Bur x Col	347	87	363	Simon et al, Genetics 08
Ct x Col	377	85	430	Simon et al, Genetics 08
Cvi x Col	367	90	509	Simon et al, Genetics 08
Sha x Col	349	86	381	Simon et al, Genetics 08
Est x Col	279	224	1720	This study
Kend x Col	282	181	1550	This study
