# Supplementary material for: QTL Mapping in New Arabidopsis thaliana Advanced Intercross-Recombinant Inbred Lines
Source: PLoS One. 2009 Feb 2;4(2):e4318. doi: 10.1371/journal.pone.0004318 (PMC2629843; doi:10.1371/journal.pone.0004318)
Supplement: Table S4 — Summary of QTL identified. (0.01 MB XLS) [file pone.0004318.s004.xls]

## Sheet: Sheet1
Population	Phenotype	Chr	LODint Markers	1.5 LOD interval	Closest marker	Physical position	Variance explained	Allele conferring later flowering/ longer hypocotyl
EstC	Blue Light	4	44607759 to nga1107	14532967 to 18096262	44606688	17.2 Mb	0.13	Est-1
EstC	Blue Light	3	44607586 to 21607496	7842037 to 11192039	44606908	9.94 Mb	0.05	Col-0
EstC	Blue Light	2	44606940 to 44606533	11456847 to 19601674	21607157	14.6 Mb	0.06	Est-1
EstC	Blue Light	5	21607402 to 44607209	2899846 to 8562462	CA72	4.2 Mb	0.06	Col-0
EstC	Red Light	2	44607063 to GPA	7432996 to 11204228	Msat 2.36	8.8 Mb	0.15	Est-1
EstC	Red Light	1	44607364 to 21607700	19672910 to 24443023	44607889	23.1 Mb	0.08	Col-0
EstC	Far Red Light	4	44606289 to nga1107	14935788 to 18096262	nga1107	18.1 Mb	0.1	Est-1
EstC	White Light	1	44607520 to F5I14	592464 to 24581765	21607165	10 Mb	0.06	Col-0
EstC	White Light	5	nga225 to 44607250	1507102 to 5275918	CA72	4.2 Mb	0.09	Col-0
KendC	LD_DTF	5	44607857 to 44607209	3093584 to 8562462	44606159	4.2 Mb	0.4	KendL
KendC	LD_TLN	5	44607857 to 44607209	3093584 to 8562462	44606159	4.2 Mb	0.37	KendL
KendC	SD_DTF	5	44607144 to 44606159	2296325 to 4235132	44607857	3.1 Mb	0.25	KendL
KendC	SD_DTF	2	44606802 to 21607209	11564515 to 18752604	44607619	18.2 Mb	0.17	Col-0
KendC	SD_TLN	2	21607157 to 21607209	14696923 to 18752604	44607619	18.2 Mb	0.31	Col-0
KendC	SD_TLN	5	44607234 to 44607242	1586121 to 5318924	44607857	3.1 Mb	0.12	KendL
